# Supplementary material for: Dipeptidyl peptidase-4 inhibitors and risk of heart failure in type 2 diabetes: systematic review and meta-analysis of randomised and observational studies
Source: PubMed Central journal article supplement — BMJ. 2016 Feb 17;352:i610. doi: 10.1136/bmj.i610 (PMC4772781; doi:10.1136/bmj.i610), 2016-02-17
Supplement: lili029738.ww2_default.pdf [file lili029738.ww2_default.pdf]

## Appendix 2 Risk of bias of included randomized controlled trials

| Author (year)                                        | Randomization sequence generation | Allocation concealment | Blinding of participants and personnel | Blinded assessment HF or HHF events | HF or HHF outcome adjudicated | Blinded HF or HHF outcome adjudication | Industry funded |
|------------------------------------------------------|-----------------------------------|------------------------|----------------------------------------|-------------------------------------|-------------------------------|----------------------------------------|-----------------|
| <b>Trials reporting heart failure</b>                |                                   |                        |                                        |                                     |                               |                                        |                 |
| Arjona Ferreira (2013) <sup>a</sup> <sup>35,36</sup> | Low                               | Unclear                | Low                                    | Low                                 | Yes                           | NR                                     | Yes             |
| Arjona Ferreira (2013) <sup>b</sup> <sup>37,38</sup> | Low                               | Unclear                | Low                                    | Low                                 | Yes                           | NR                                     | Yes             |
| Bosi (2011) <sup>39</sup>                            | Unclear                           | Unclear                | Low                                    | Low                                 | NR                            | NR                                     | Yes             |
| Ferrannini (2009) <sup>40</sup>                      | Unclear                           | Unclear                | Low                                    | Low                                 | Yes                           | Yes                                    | Yes             |
| Fonseca (2013) <sup>41</sup>                         | Unclear                           | Unclear                | Low                                    | Low                                 | Yes                           | NR                                     | Yes             |
| Garber (2007) <sup>42</sup>                          | Unclear                           | Unclear                | Low                                    | Low                                 | NR                            | NR                                     | Yes             |
| Henry (2014) <sup>43,44</sup>                        | Unclear                           | Unclear                | Low                                    | Low                                 | NR                            | NR                                     | Yes             |
| Iwamoto (2010) <sup>45,46</sup>                      | Low                               | Low                    | Low                                    | Low                                 | NR                            | NR                                     | Yes             |
| NCT00094770 (2009) <sup>47-49</sup>                  | Low                               | Unclear                | Low                                    | Low                                 | NR                            | NR                                     | Yes             |
| NCT00103857 (2009) <sup>50,51</sup>                  | Unclear                           | Unclear                | Low                                    | Low                                 | NR                            | NR                                     | Yes             |
| NCT00121641 (2011) <sup>52,53</sup>                  | Unclear                           | Unclear                | Low                                    | Low                                 | NR                            | NR                                     | Yes             |
| NCT00121667 (2011) <sup>54,55</sup>                  | Low                               | Low                    | Low                                    | Low                                 | NR                            | NR                                     | Yes             |
| NCT00286442 (2011) <sup>56,57</sup>                  | Low                               | Low                    | Low                                    | Low                                 | NR                            | NR                                     | Yes             |
| NCT00286468 (2011) <sup>58,59</sup>                  | Low                               | Unclear                | Low                                    | Low                                 | NR                            | NR                                     | Yes             |
| NCT00295633 (2009) <sup>60-62</sup>                  | Low                               | Low                    | Low                                    | Low                                 | NR                            | NR                                     | Yes             |
| NCT00327015 (2009) <sup>63-65</sup>                  | Low                               | Low                    | Low                                    | Low                                 | NR                            | NR                                     | Yes             |
| NCT00395343 (2009) <sup>66,67</sup>                  | Low                               | Unclear                | Low                                    | Low                                 | NR                            | NR                                     | Yes             |
| NCT00482729 (2009) <sup>68-70</sup>                  | Unclear                           | Unclear                | Low                                    | Low                                 | NR                            | NR                                     | Yes             |
| NCT00575588 (2010) <sup>71-73</sup>                  | Unclear                           | Unclear                | Low                                    | Low                                 | NR                            | NR                                     | Yes             |
| NCT00614939 (2010) <sup>74-76</sup>                  | Low                               | Low                    | Low                                    | Low                                 | NR                            | NR                                     | Yes             |
| NCT00622284 (2011) <sup>77,78</sup>                  | Low                               | Low                    | Low                                    | Low                                 | Yes                           | Yes                                    | Yes             |

|                                                              |         |         |         |         |     |     |     |
|--------------------------------------------------------------|---------|---------|---------|---------|-----|-----|-----|
| NCT00642278 (2013) <sup>79,80</sup>                          | Unclear | Unclear | Low     | Low     | NR  | NR  | Yes |
| NCT00707993 (2013) <sup>81,82</sup>                          | Unclear | Unclear | Low     | Low     | NR  | NR  | Yes |
| NCT00757588 (2011) <sup>83,84</sup>                          | Low     | Low     | Low     | Low     | NR  | NR  | Yes |
| NCT00798161 (2011) <sup>85,86</sup>                          | Unclear | Unclear | Low     | Low     | NR  | NR  | Yes |
| NCT00838903 (2014) <sup>87,88</sup>                          | Unclear | Unclear | Low     | Low     | Yes | NR  | Yes |
| NCT00856284 (2013) <sup>89,90</sup>                          | Unclear | Unclear | Low     | Low     | Yes | Yes | Yes |
| NCT00954447 (2012) <sup>91</sup>                             | Unclear | Unclear | Low     | Low     | NR  | NR  | Yes |
| NCT01006603 (2013) <sup>92</sup>                             | Unclear | Unclear | Low     | Low     | NR  | NR  | Yes |
| NCT01189890 (2013) <sup>93</sup>                             | Unclear | Unclear | Low     | Low     | NR  | NR  | Yes |
| NCT01263483 (2011) <sup>94,95</sup>                          | Low     | Low     | Low     | Low     | NR  | NR  | Yes |
| NCT01289990 (2014) <sup>96</sup>                             | Unclear | Unclear | Low     | Low     | NR  | NR  | Yes |
| Pratley (2009) <sup>97,98</sup>                              | Low     | Low     | Low     | Low     | NR  | NR  | Yes |
| Pratley (2014) <sup>99</sup>                                 | Unclear | Unclear | Low     | Low     | Yes | Yes | Yes |
| Rosenstock (2006) <sup>100</sup>                             | Unclear | Unclear | Low     | Low     | NR  | NR  | Yes |
| Rosenstock (2010) <sup>101</sup>                             | Unclear | Unclear | Low     | Low     | NR  | NR  | Yes |
| Seino (2012) <sup>102</sup>                                  | Low     | Low     | Low     | Low     | NR  | NR  | Yes |
| Yang (2015) <sup>103</sup>                                   | Unclear | Unclear | Low     | Low     | NR  | NR  | Yes |
| <b>Trials reporting hospital admission for heart failure</b> |         |         |         |         |     |     |     |
| Green (2015) (TECOS) <sup>12</sup>                           | Low     | Low     | Low     | Low     | Yes | Yes | Yes |
| Krum (2014) (VIVID) <sup>104</sup>                           | Unclear | Unclear | Unclear | Unclear | Yes | NR  | Yes |
| Laakso (2015) <sup>105</sup>                                 | Unclear | Unclear | Low     | Low     | Yes | NR  | Yes |
| Scirica (2013) (SAVOR-TIMI 53) <sup>9,106</sup>              | Low     | Low     | Low     | Low     | Yes | Yes | Yes |
| Zannad (2015) (EXAMINE) <sup>11,107,108</sup>                | Unclear | Unclear | Low     | Low     | Yes | Yes | Yes |

HF: heart failure; HHF: hospital admission for heart failure; Low: low risk of bias; High: high risk of bias; Unclear: unclear risk of bias; NR: not reported.
