# Supplementary material for: Dipeptidyl peptidase-4 inhibitors and risk of heart failure in type 2 diabetes: systematic review and meta-analysis of randomised and observational studies
Source: PubMed Central journal article supplement — BMJ. 2016 Feb 17;352:i610. doi: 10.1136/bmj.i610 (PMC4772781; doi:10.1136/bmj.i610), 2016-02-17
Supplement: lili029738.ww3_default.pdf [file lili029738.ww3_default.pdf]

Appendix 3 Supplementary forest plots

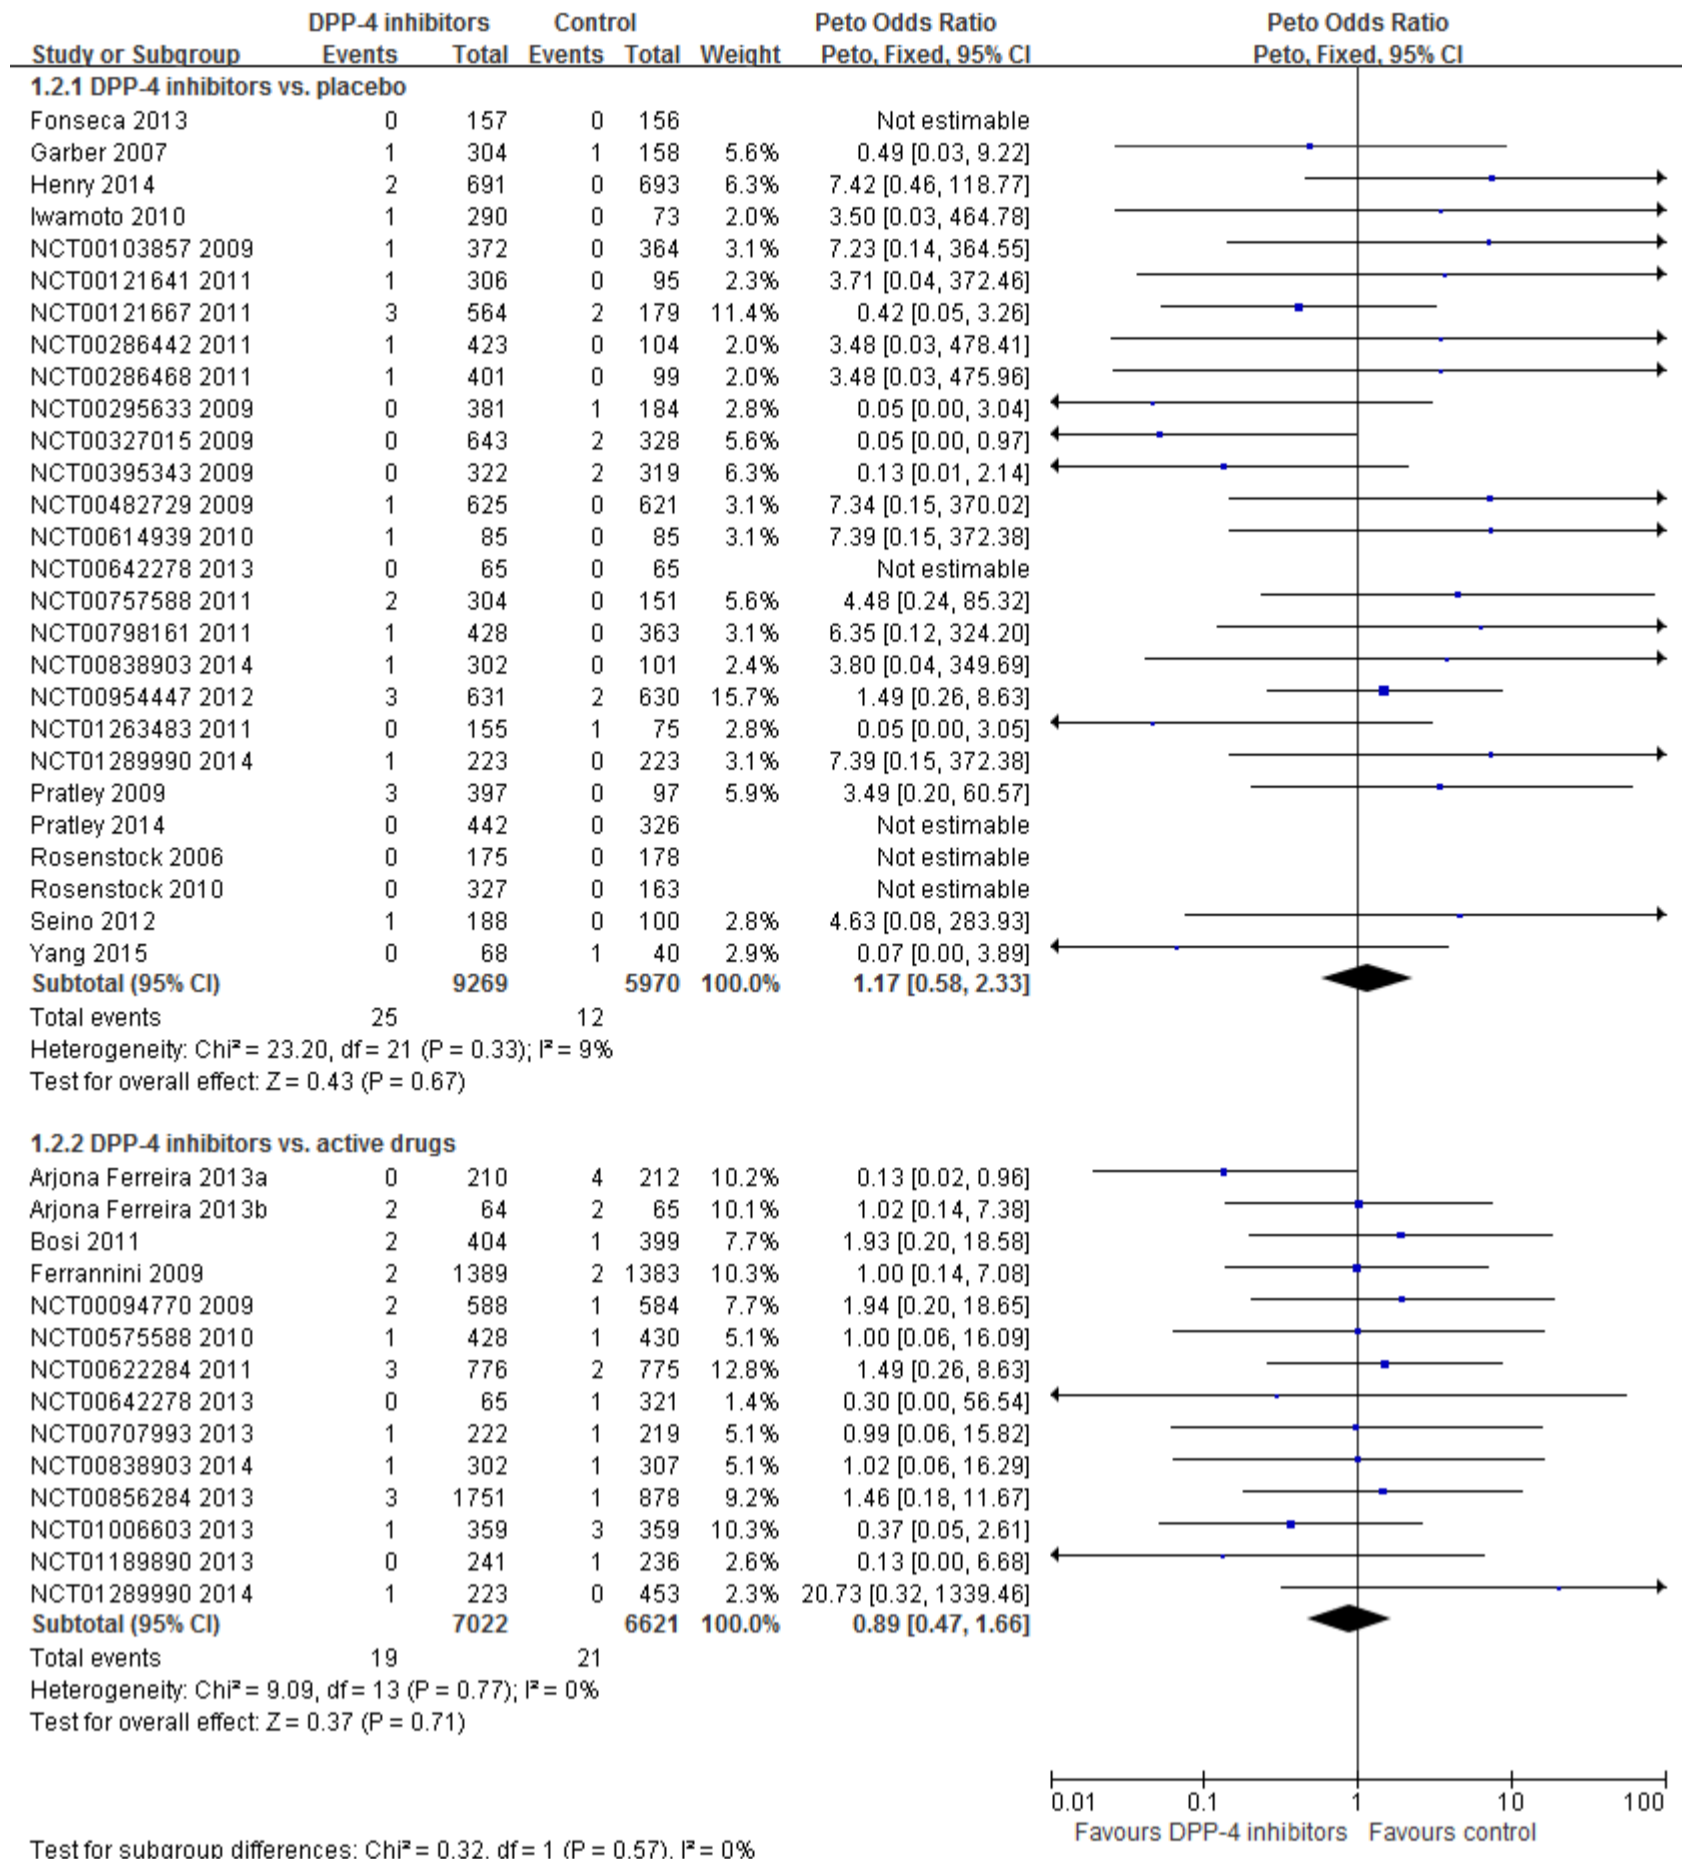

Fig A Subgroup analysis of heart failure risk by type of control in randomized controlled trials

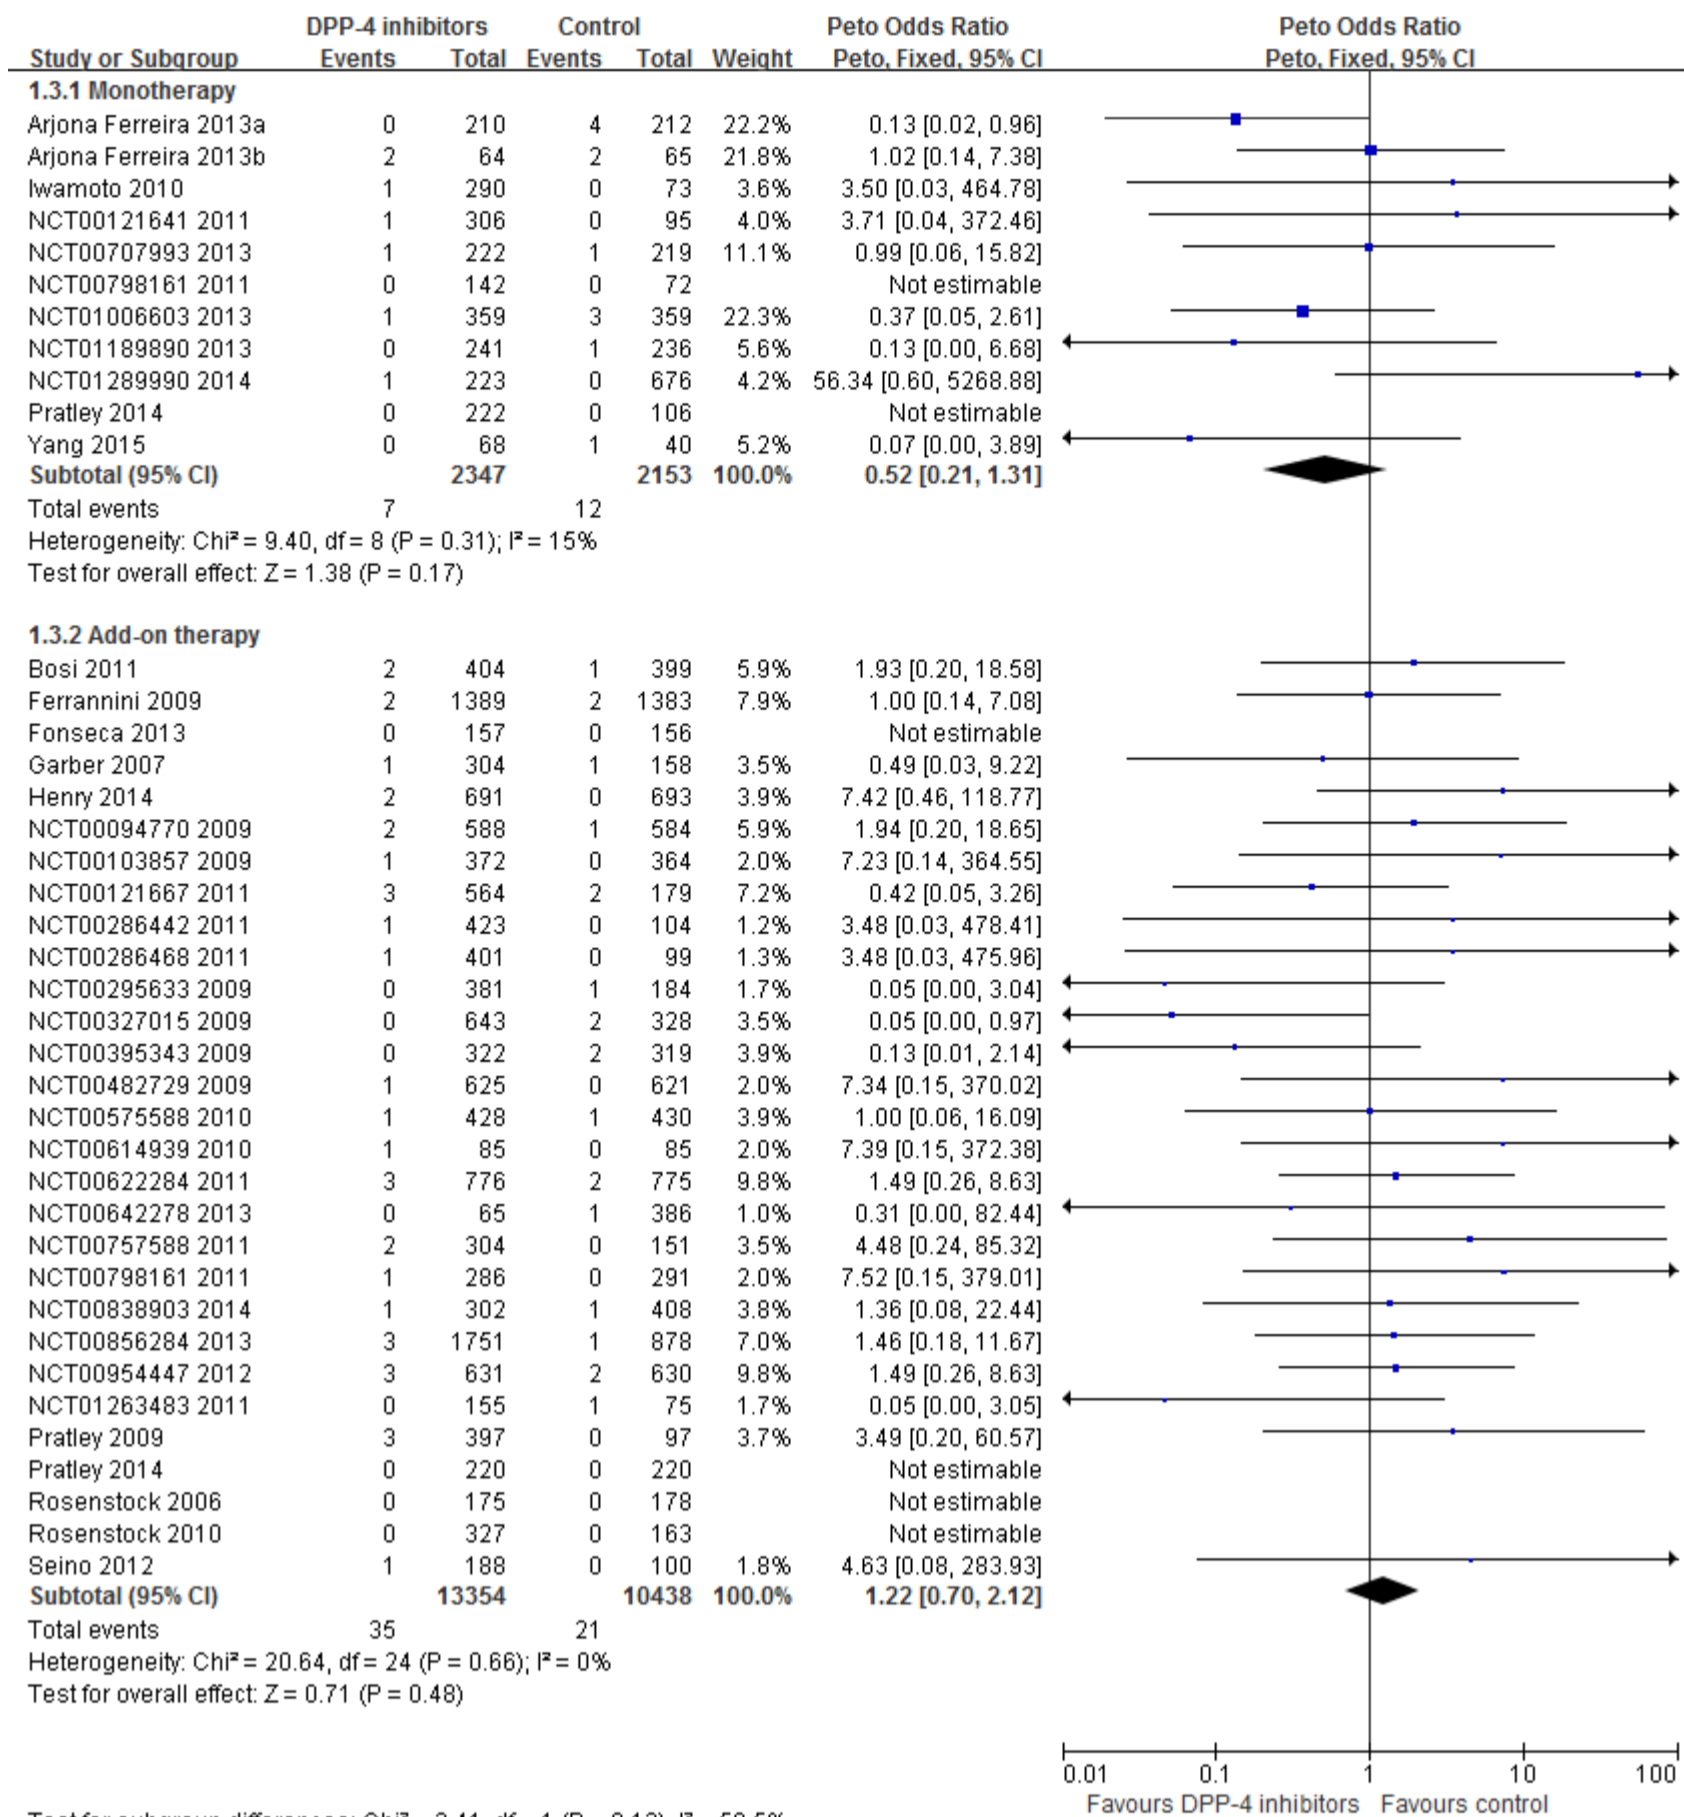

**Fig B** Subgroup analysis of heart failure risk by mode of therapy in randomized controlled trials

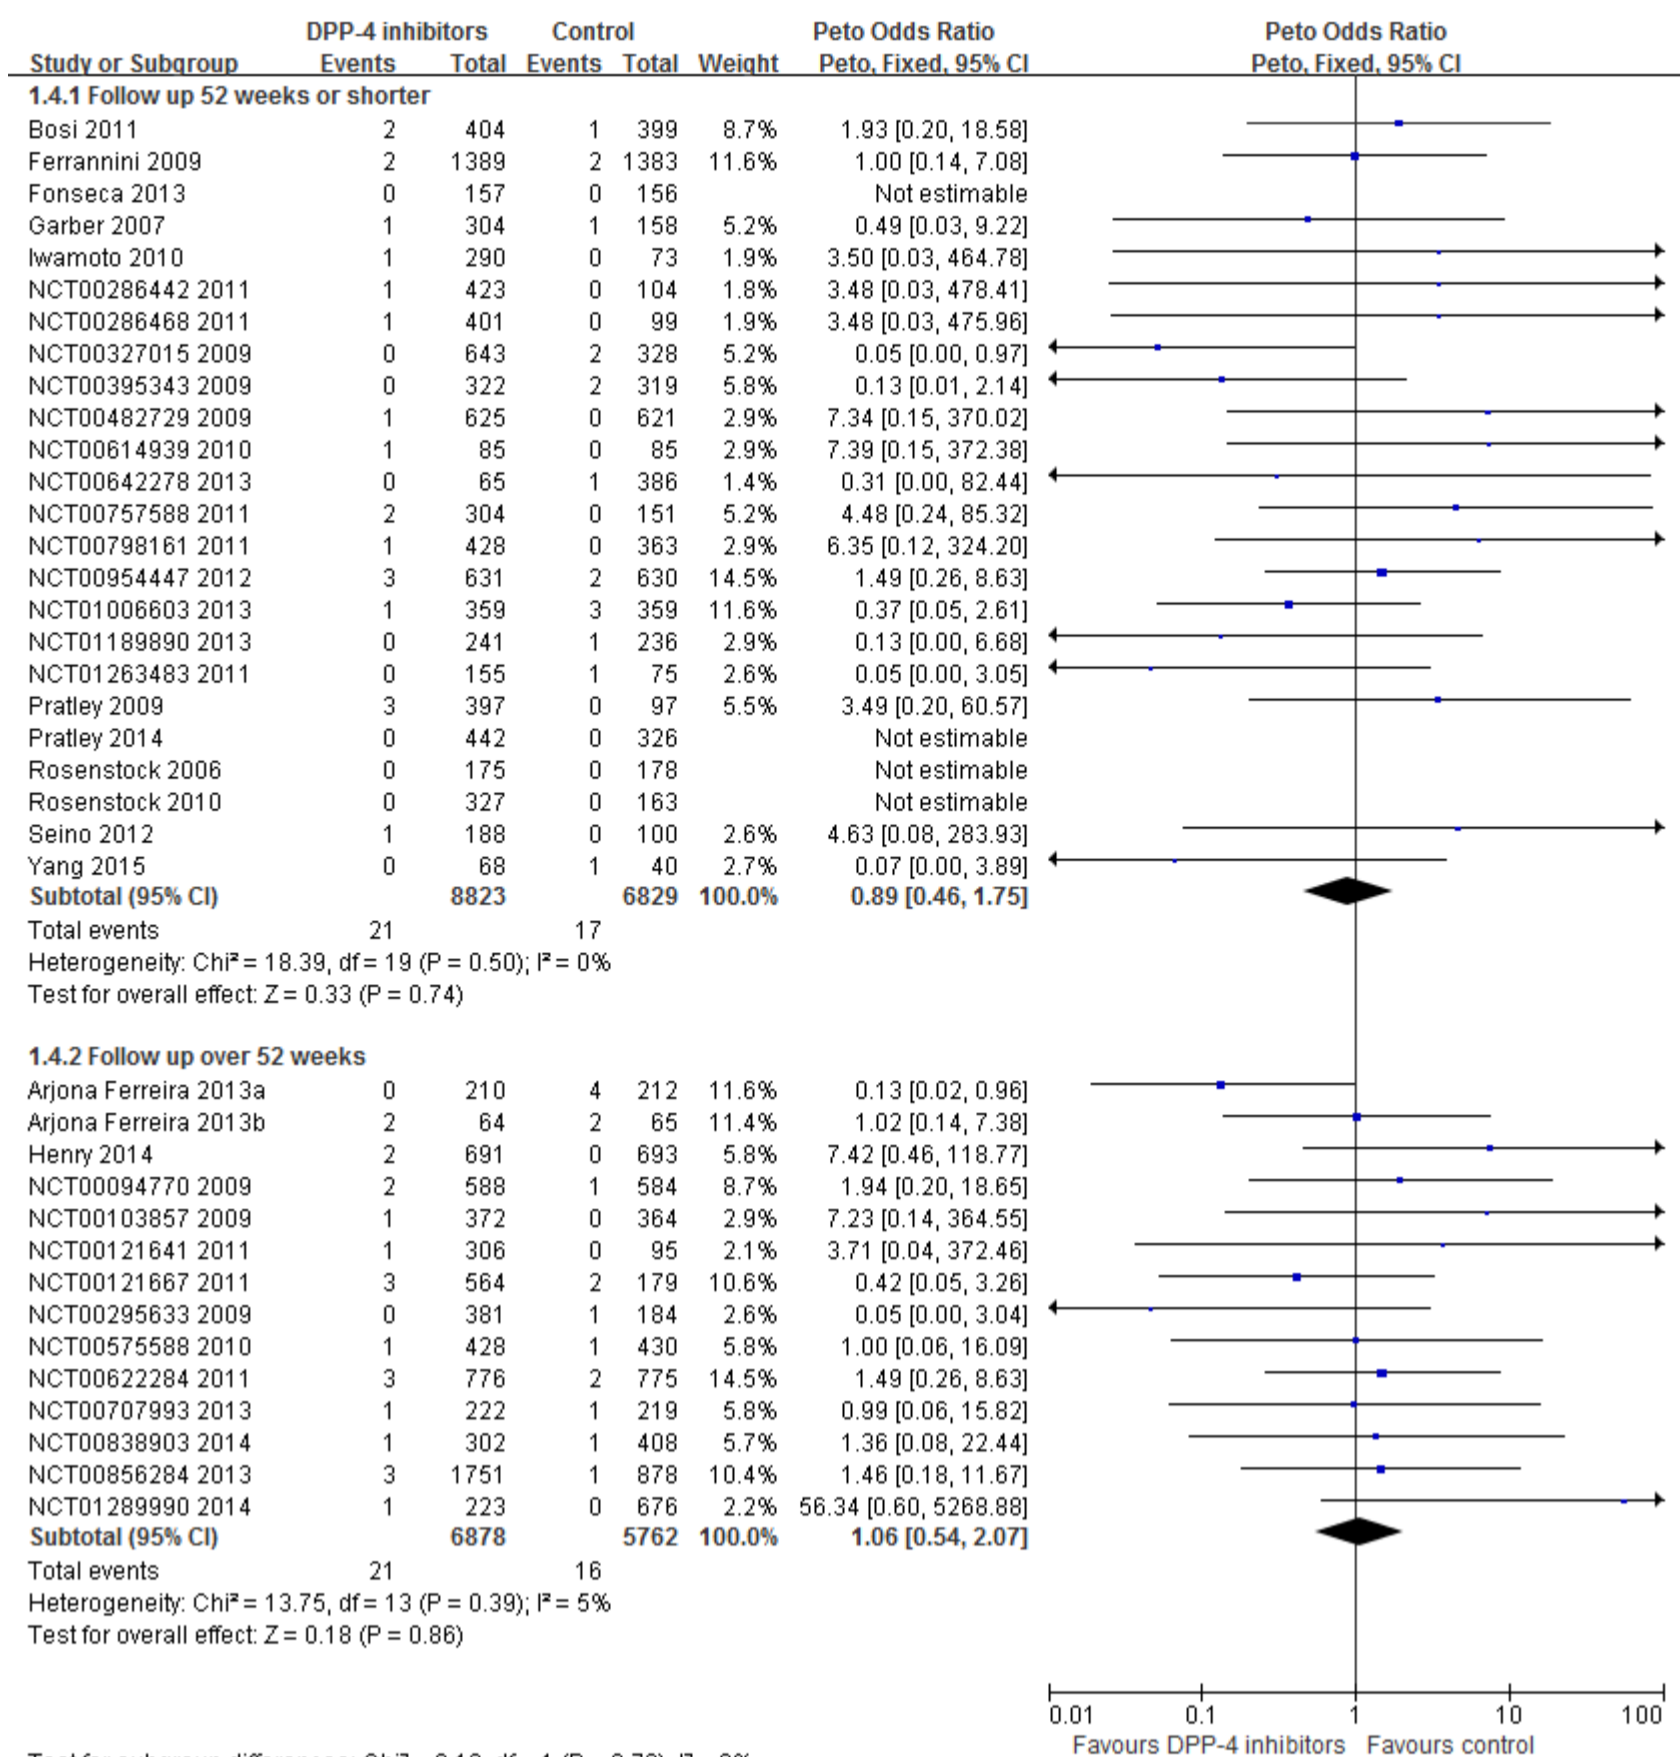

**Fig C** Subgroup analysis of heart failure risk by length of follow up in randomized controlled trials

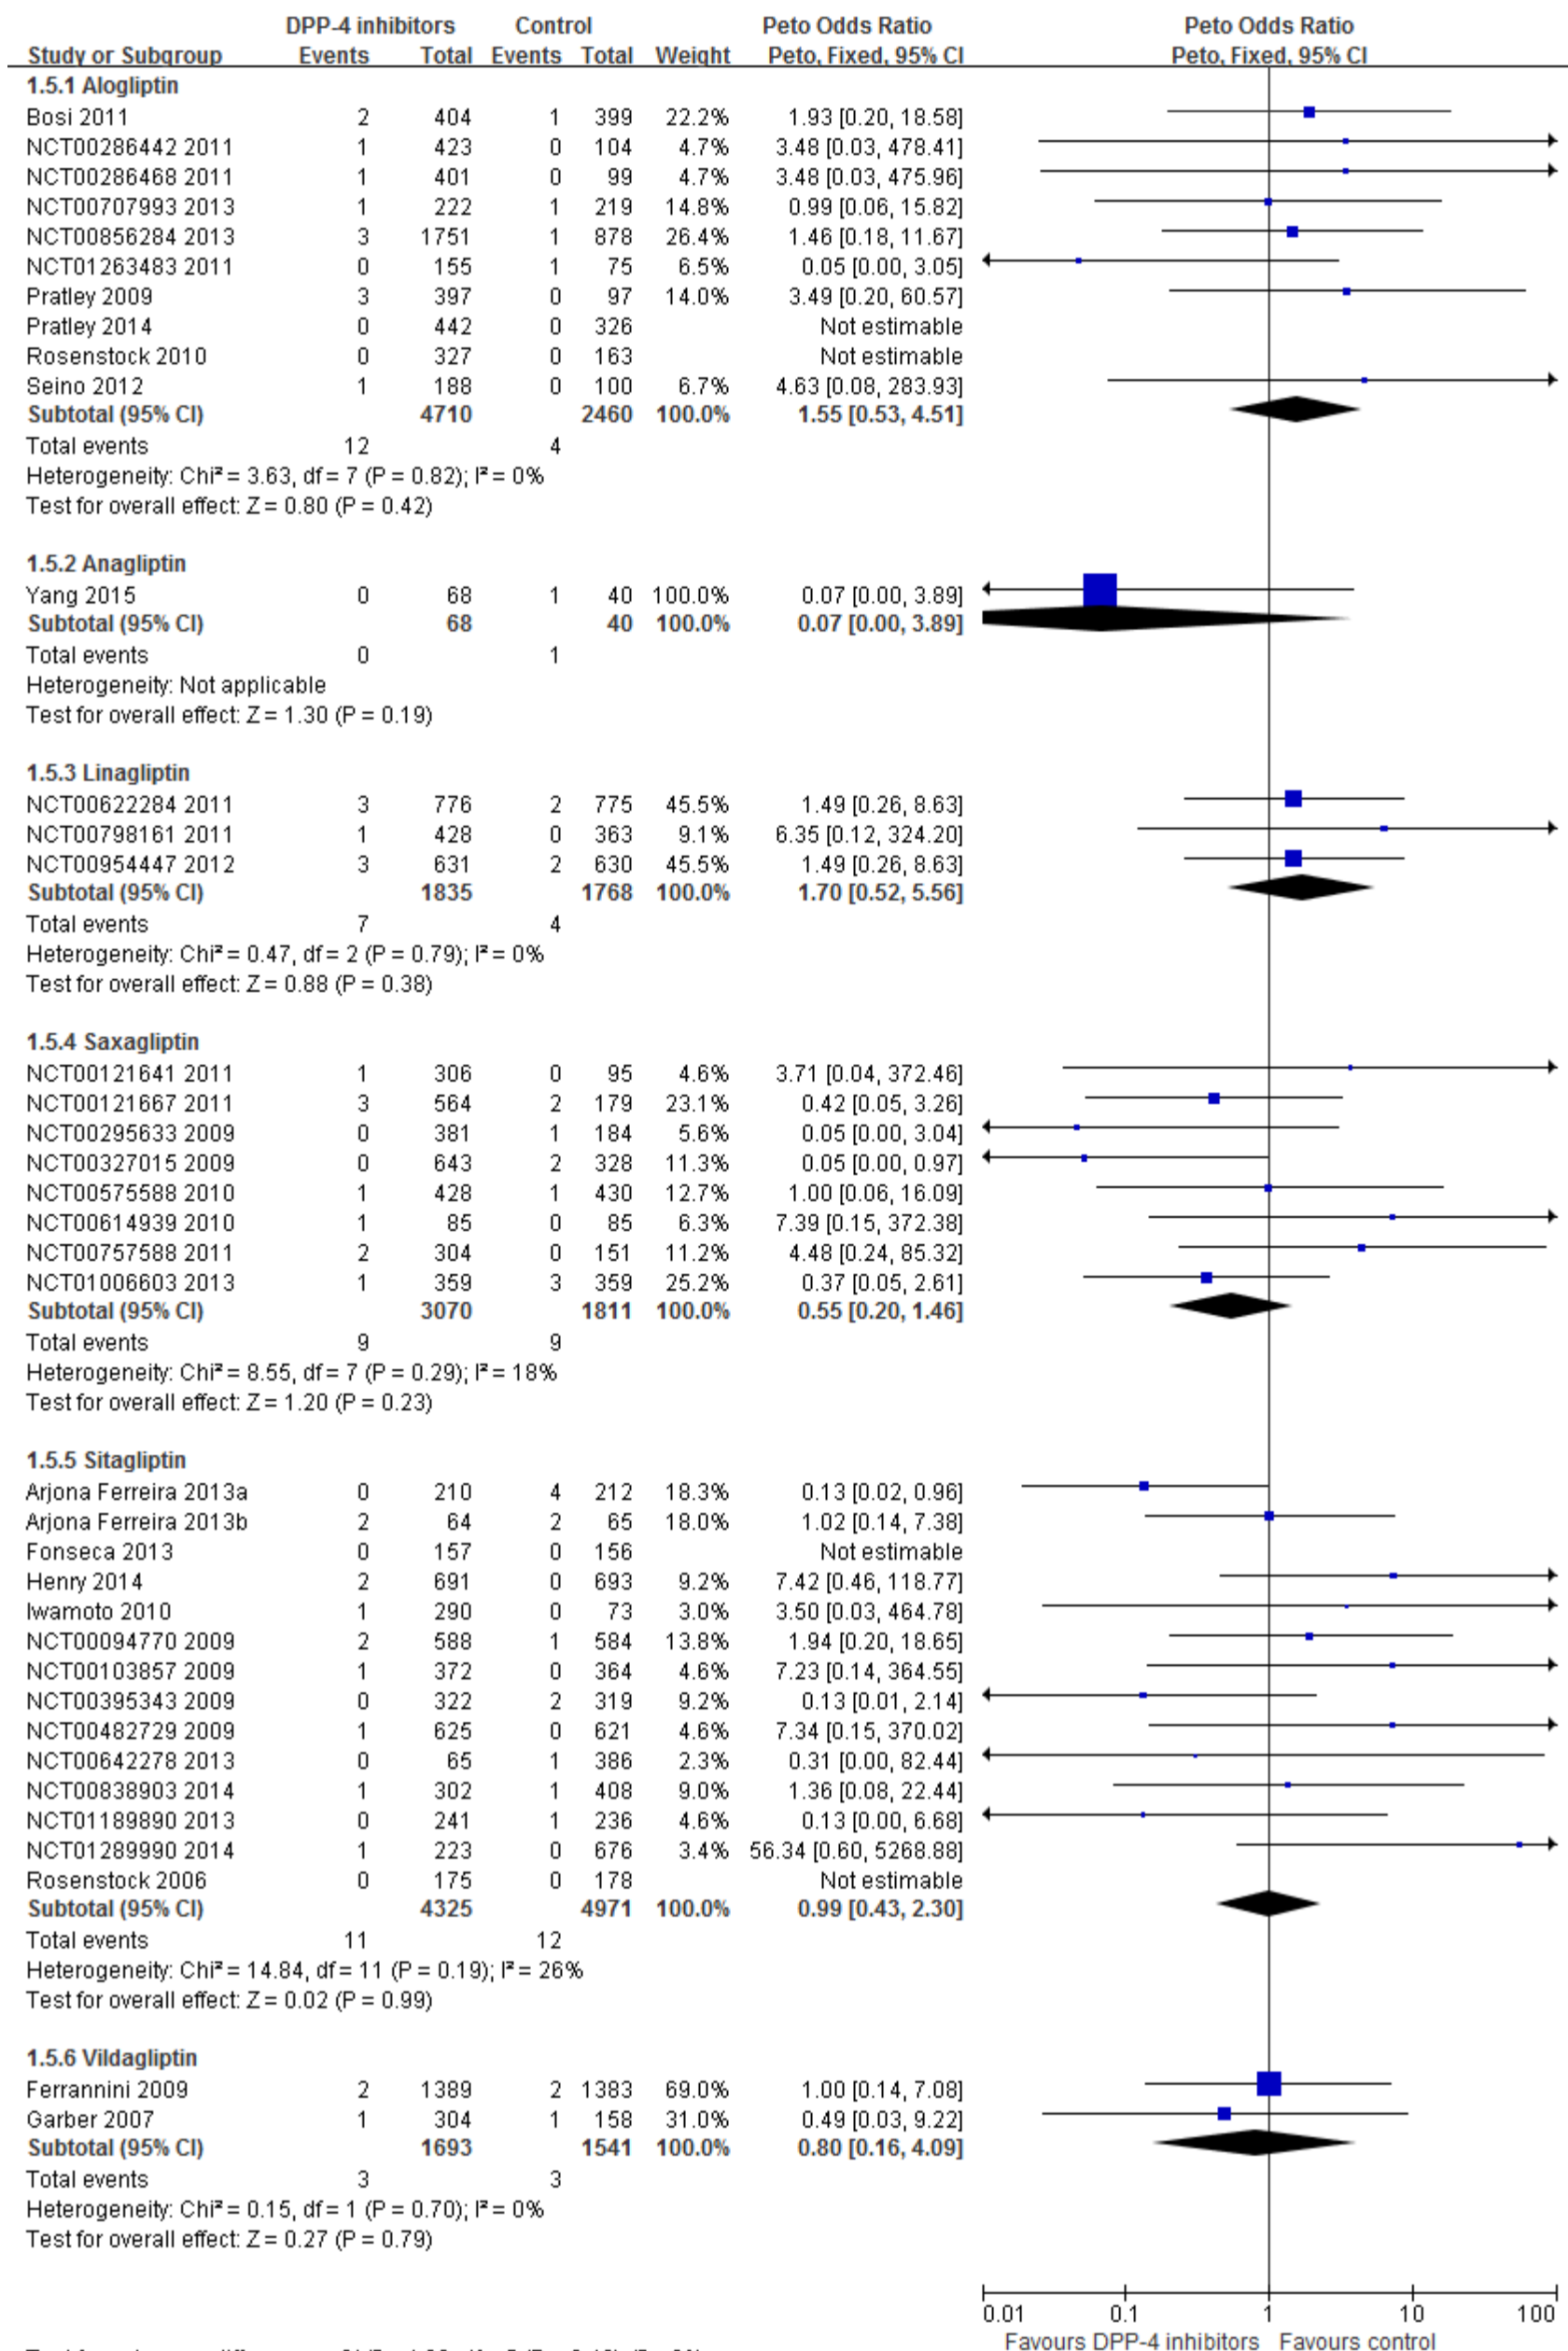

Test for subgroup differences: Chi<sup>2</sup> = 4.63, df = 5 (P = 0.46), I<sup>2</sup> = 0%

**Fig D** Subgroup analysis of heart failure risk by individual DPP-4 inhibitors agents in randomized controlled trials

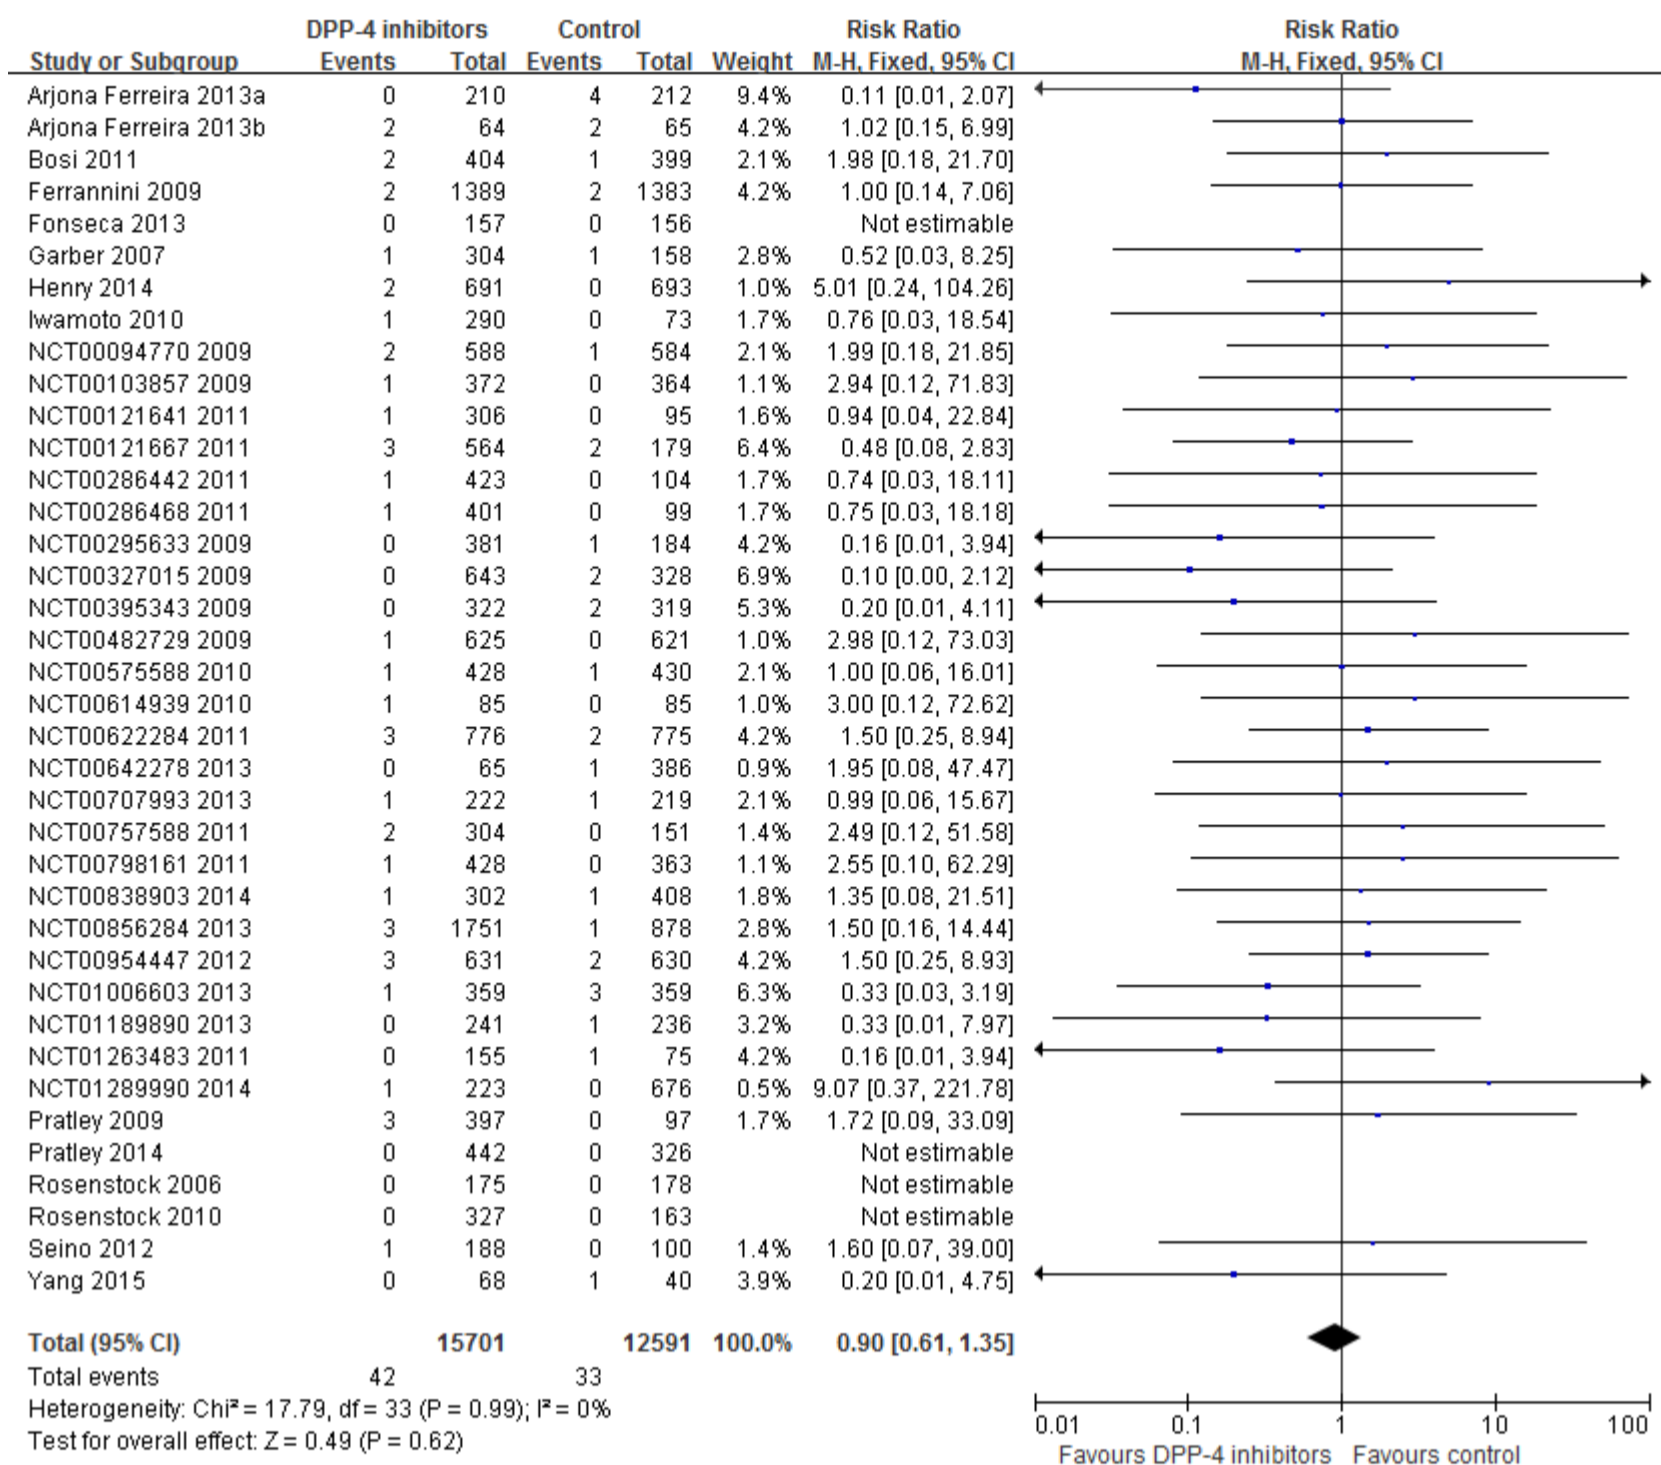

**Fig E** Sensitivity analysis of heart failure risk by using alternative effect measure risk ratio in randomized controlled trials

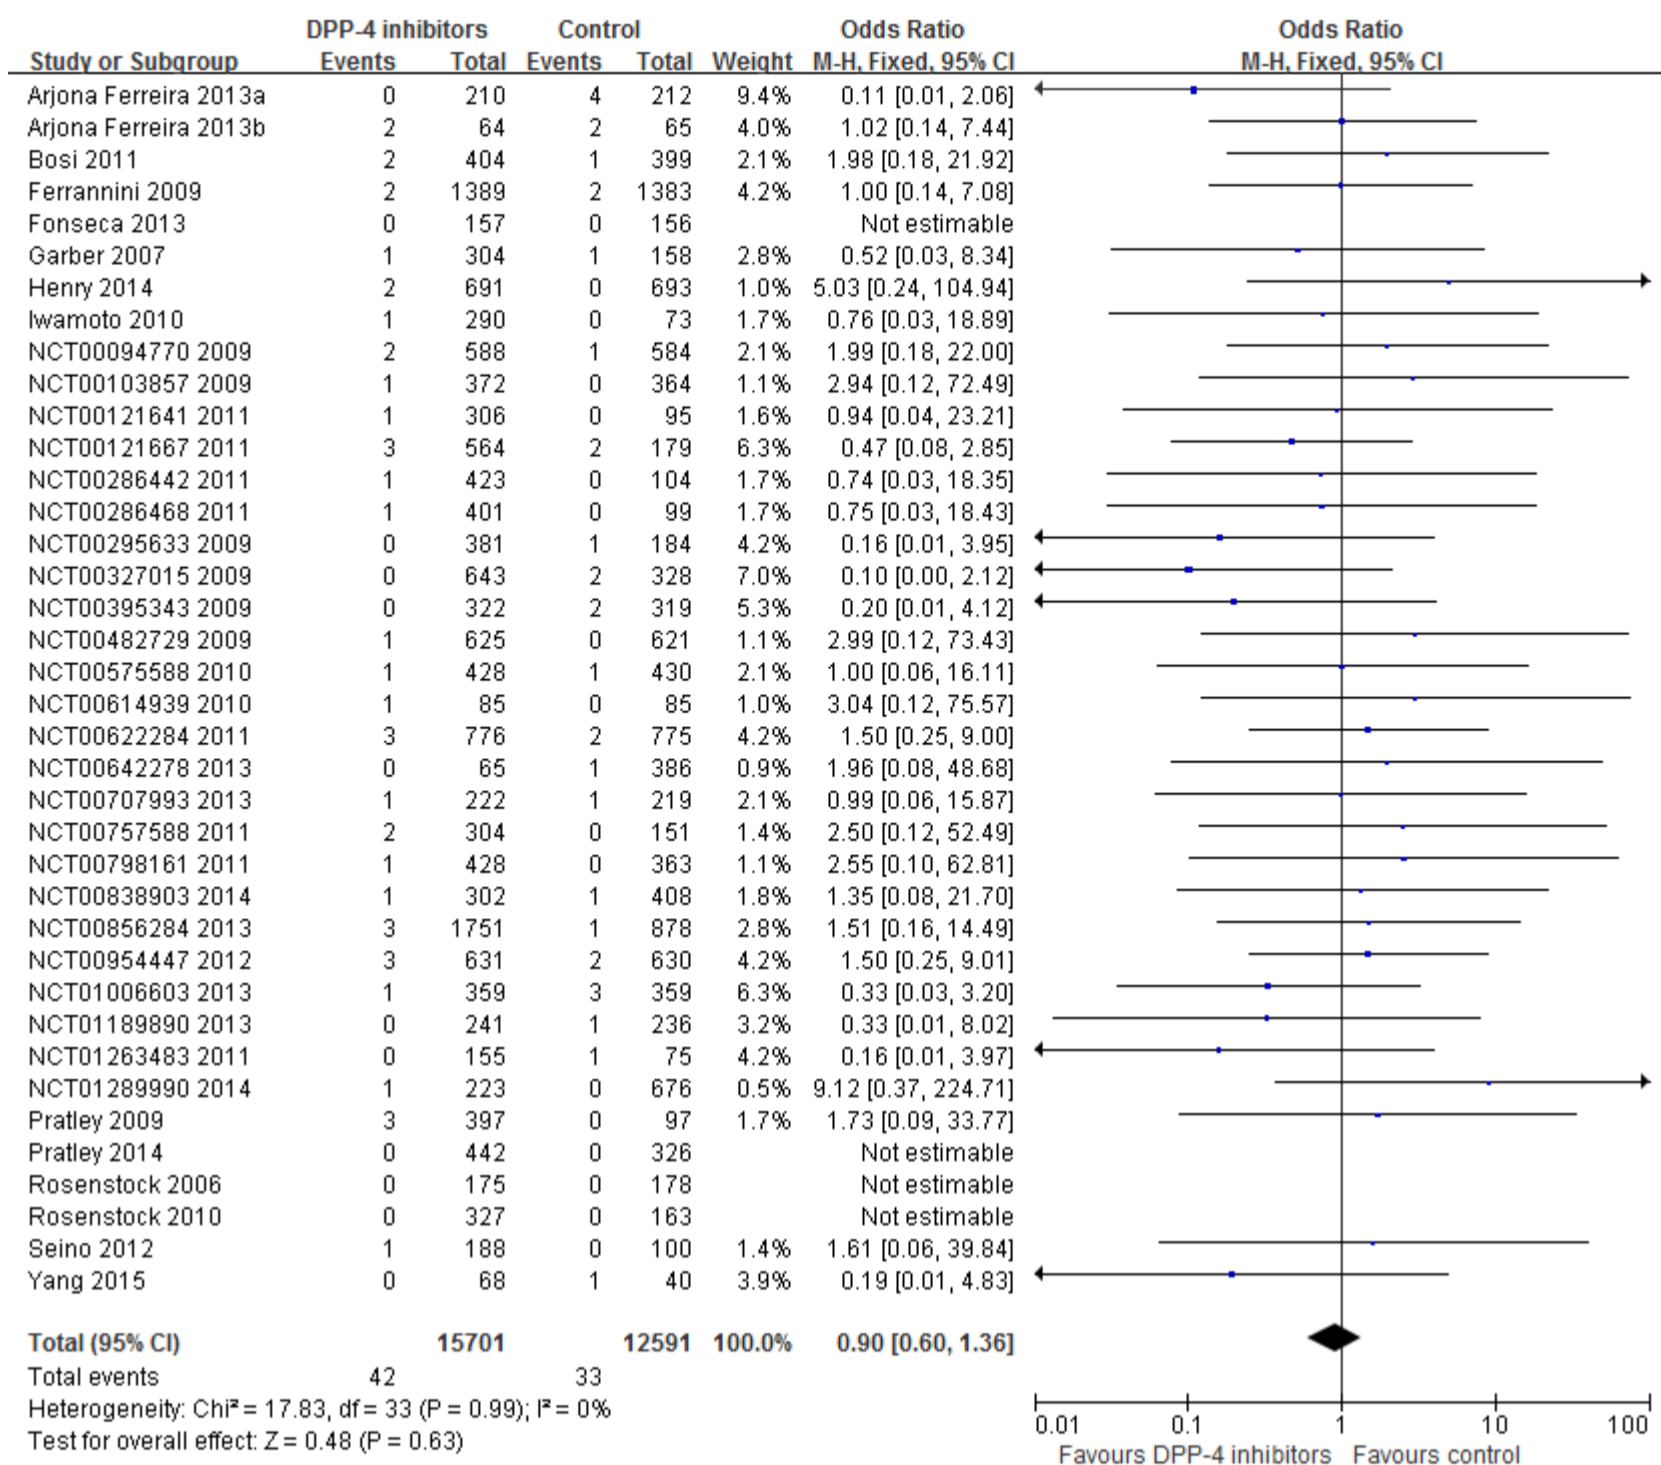

**Fig F** Sensitivity analysis of heart failure risk by using fixed Mantel-Hanszel statistical model in randomized controlled trials

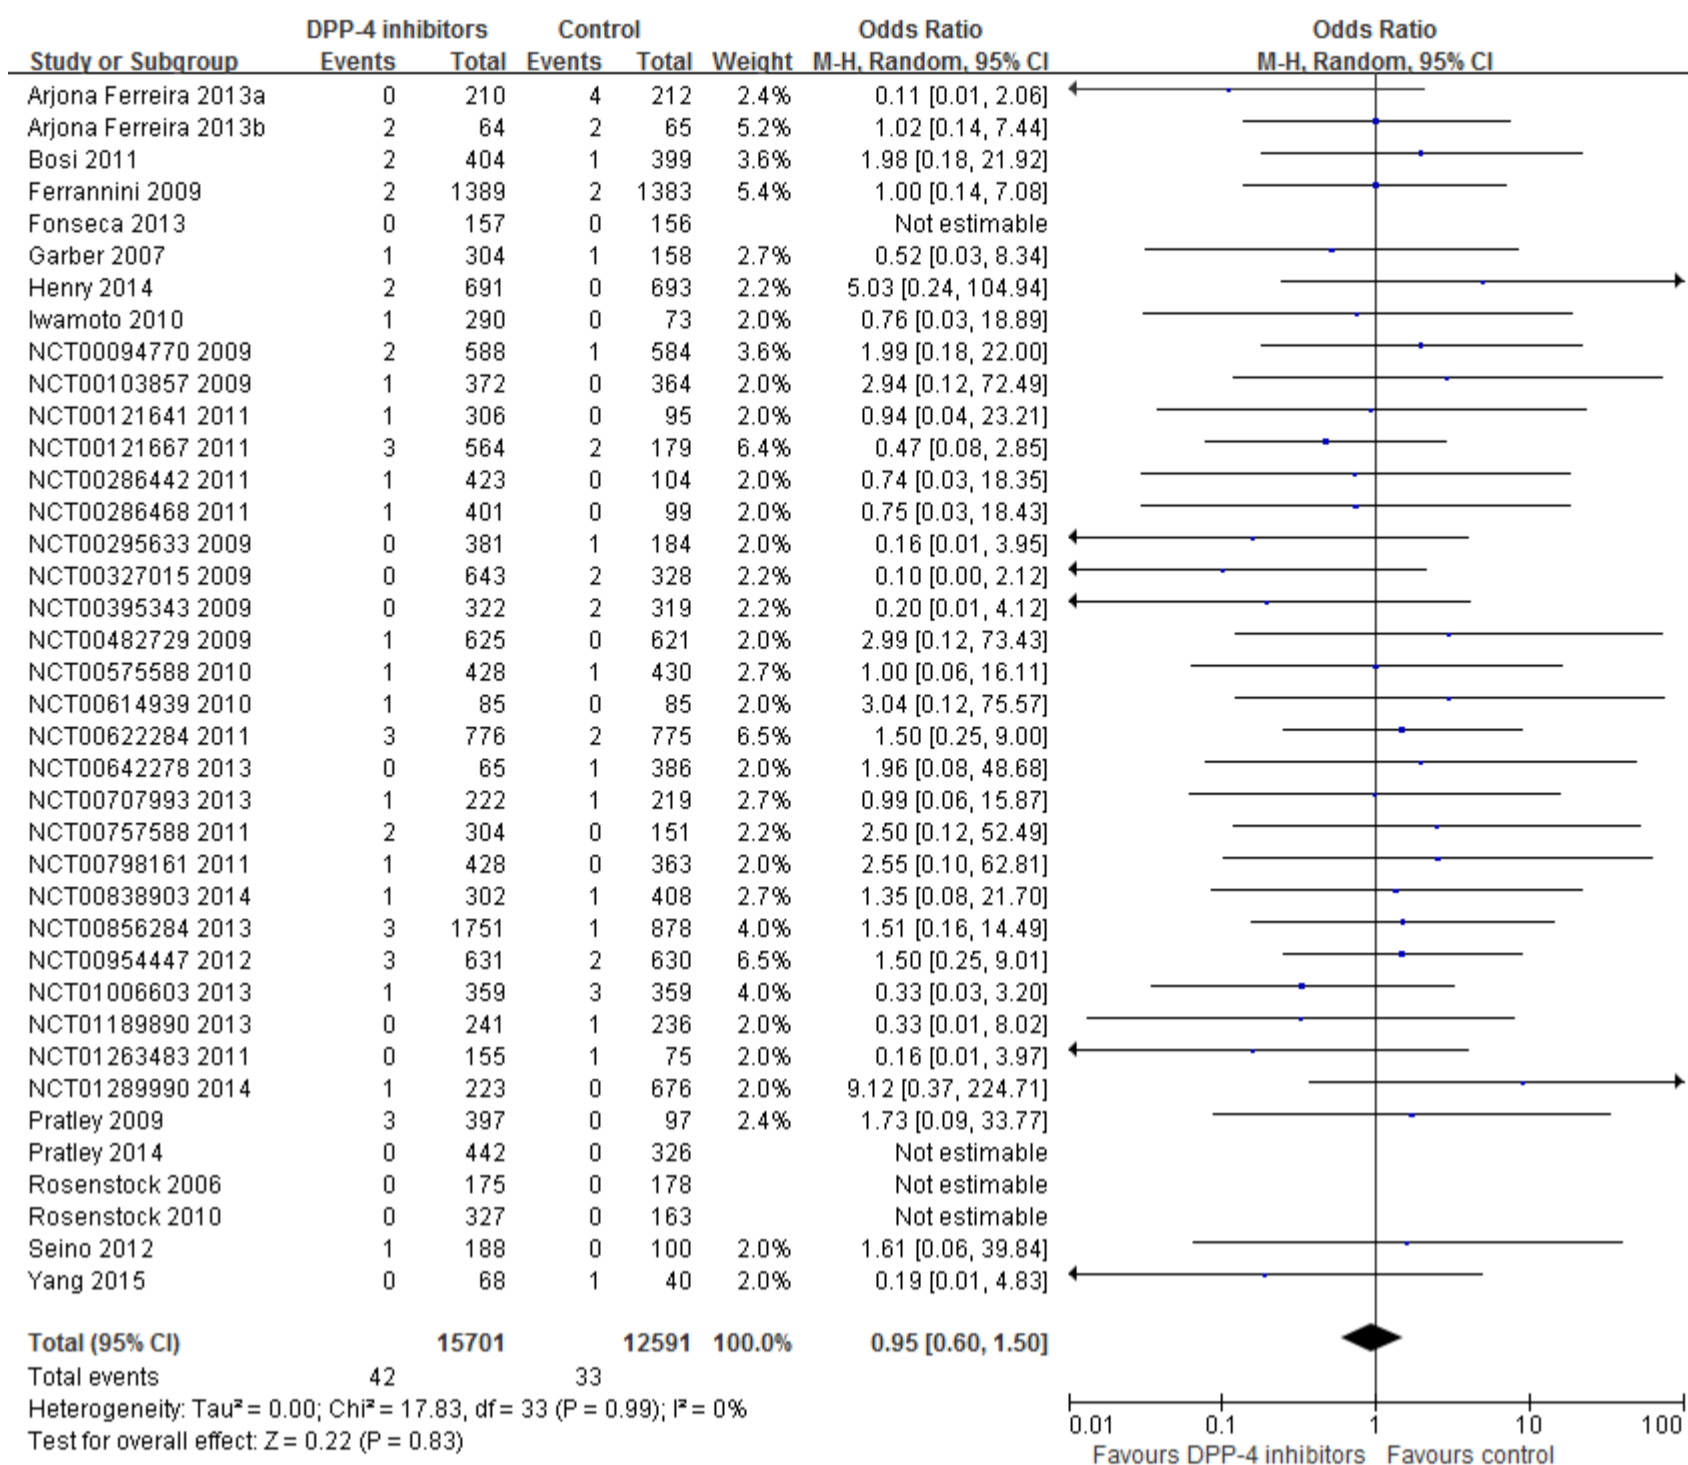

**Fig G** Sensitivity analysis of heart failure risk by using random effects model in randomized controlled trials

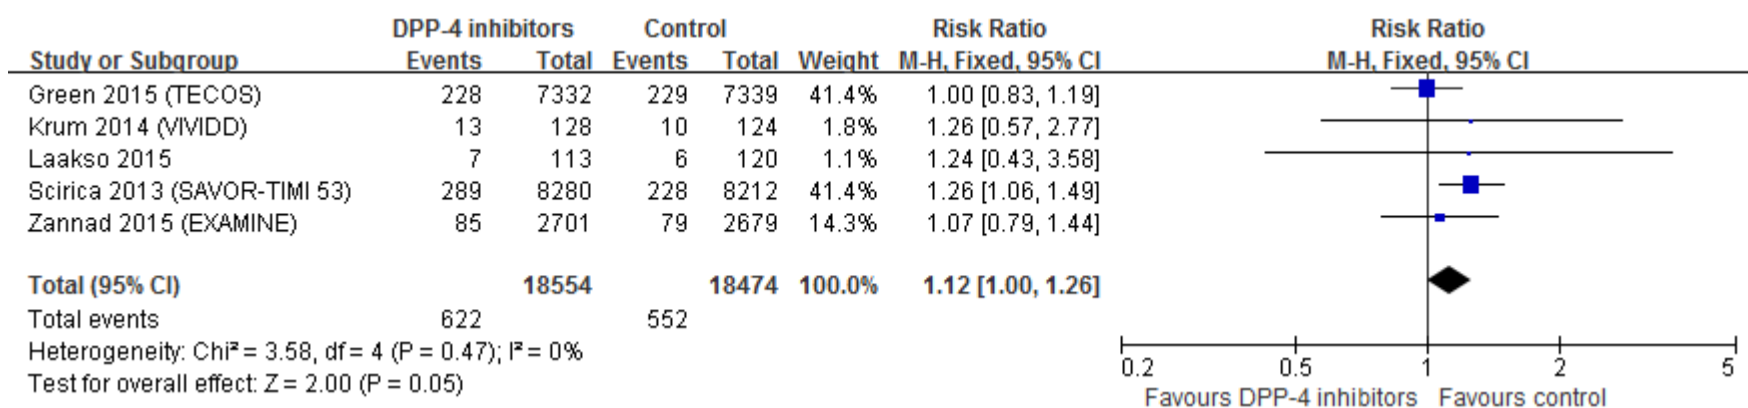

**Fig H** Sensitivity analysis of hospital admission for heart failure by using alternative effect measure risk ratio in randomized controlled trials

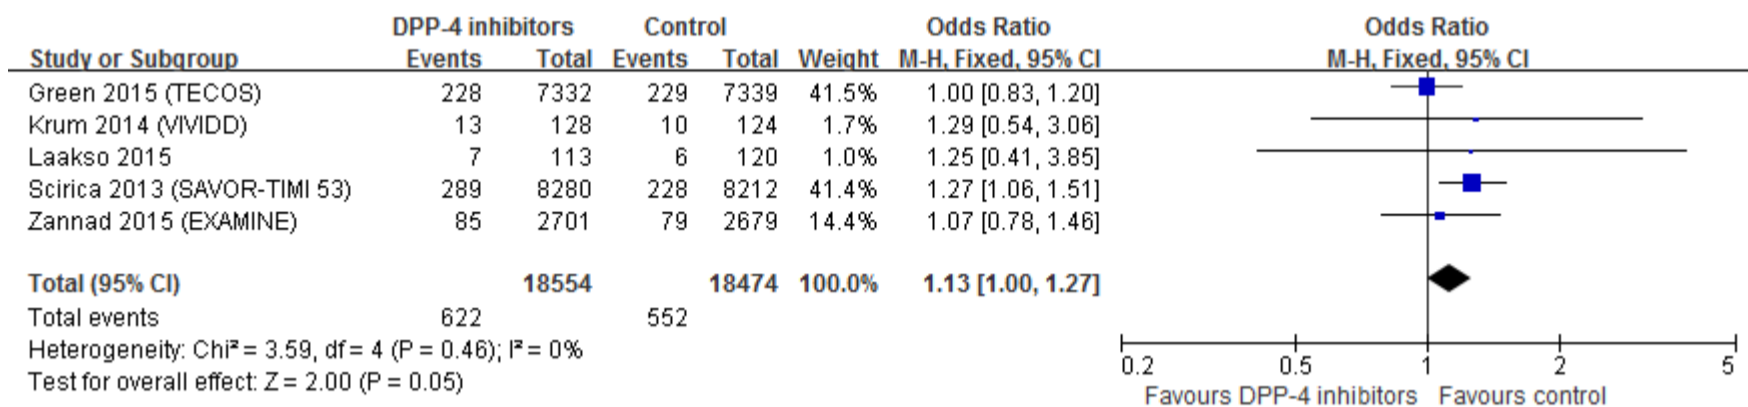

**Fig I** Sensitivity analysis of hospital admission for heart failure by using fixed Mantel-Hanszel statistical model in randomized controlled trials

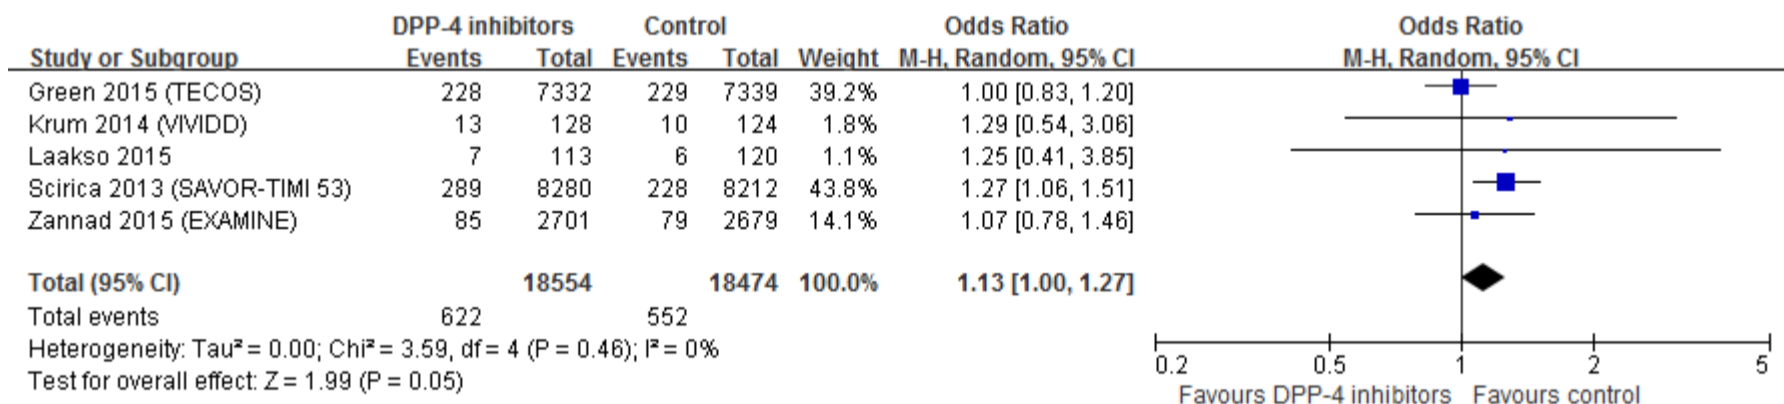

**Fig J** Sensitivity analysis of hospital admission for heart failure by using random effects model in randomized controlled trials
