# Supplementary material for: Dipeptidyl peptidase-4 inhibitors and risk of heart failure in type 2 diabetes: systematic review and meta-analysis of randomised and observational studies
Source: PubMed Central journal article supplement — BMJ. 2016 Feb 17;352:i610. doi: 10.1136/bmj.i610 (PMC4772781; doi:10.1136/bmj.i610), 2016-02-17
Supplement: lili029738.ww4_default.pdf [file lili029738.ww4_default.pdf]

## Appendix 4 Risk of bias of included cohort studies

| Author (year)                                                 | Ascertainment of type 2 diabetes                                                            | Ascertainment of exposure to DPP-4 inhibitors agents                                        | Selection of the non exposed cohort                  | Ascertainment of other confounding variables | Demonstration that outcome of interest was not present at start of study                                                           | Comparability of study controls for important factors                                                                                                                                                                                                                                                                                                                            | Assessment of outcome                                                                          | Completeness of outcome and exposure variables                                                                              |
|---------------------------------------------------------------|---------------------------------------------------------------------------------------------|---------------------------------------------------------------------------------------------|------------------------------------------------------|----------------------------------------------|------------------------------------------------------------------------------------------------------------------------------------|----------------------------------------------------------------------------------------------------------------------------------------------------------------------------------------------------------------------------------------------------------------------------------------------------------------------------------------------------------------------------------|------------------------------------------------------------------------------------------------|-----------------------------------------------------------------------------------------------------------------------------|
| <b>Studies reporting heart failure</b>                        |                                                                                             |                                                                                             |                                                      |                                              |                                                                                                                                    |                                                                                                                                                                                                                                                                                                                                                                                  |                                                                                                |                                                                                                                             |
| Gitt (2013) <sup>109</sup>                                    | Type 2 diabetes patients identified by physicians                                           | Data collected during the follow up                                                         | Drawn from the same population as the exposed cohort | NR                                           | No, more patients in the DPP4 inhibitors groups had heart failure at baseline compared sulfonylurea group (8.9% vs. 3.9%, P< 0.05) | Patient characteristics, blood glucose, blood pressure, and cardiovascular comorbidities were virtually identical                                                                                                                                                                                                                                                                | Data collected during the follow up                                                            | The available patients follow up data for DPP-4 inhibitors group was 90.1%, and sulfonylurea group was 81.6%                |
| NCT01357135 (2014) <sup>110</sup>                             | Statement not explicit; type 2 diabetes patients likely identified by general practitioners | Drug prescription in the routine clinical practice                                          | Drawn from the same population as the exposed cohort | NR                                           | NR                                                                                                                                 | Patients had statistical difference in age, and no adjusted analysis were conducted                                                                                                                                                                                                                                                                                              | Statement not explicit; likely from the data collected during the follow up                    | There were 8 and 0 participants with missing baseline gender in the sitagliptin group and sulfonylureas group, respectively |
| Kannan (2015) <sup>111</sup>                                  | Statement not explicit; likely from identifying ICD-9 code in the database                  | Statement not explicit; likely from the drug prescription in the electronic medical records | Drawn from the same population as the exposed cohort | NR                                           | Yes, patients who had a history of cardiovascular disease or congestive heart failure at baseline were excluded                    | Cox regression model was used to adjust baseline medical history variables (age, sex, race, BMI, number of encounters, median household income, smoking status, systolic and diastolic blood pressure, drugs used, comorbidities and propensity for being on metformin and sulfonylureas at baseline), and laboratory data (lipid profile, estimated glomerular filtration rate) | ICD-9 codes and/or a documentation of a post-baseline left ventricular ejection fraction < 40% | Authors did not mention the completeness of outcome and exposure variable data in the database                              |
| <b>Studies reporting hospital admission for heart failure</b> |                                                                                             |                                                                                             |                                                      |                                              |                                                                                                                                    |                                                                                                                                                                                                                                                                                                                                                                                  |                                                                                                |                                                                                                                             |
| Fadini (2015) <sup>13</sup>                                   | Statement not explicit; likely from identifying patients                                    | DPP-4 inhibitors exposure identified by anatomical                                          | Drawn from the same population as the exposed cohort | Confounding variables (e.g., previous        | Yes, patients with a previous hospitalization for                                                                                  | Cox proportional hazard regression was used to adjust for age, sex, the use of certain                                                                                                                                                                                                                                                                                           | Hospital discharge event with a primary diagnosis                                              | Authors did not mention the completeness of                                                                                 |

|                            |                                                                                                                                                      |                                                                           |                                                      |                                                                                                                                                                                                                             |                                                                                                                 |                                                                                                                                                                                                                                                                                                                      |                                   |                                                                                                |
|----------------------------|------------------------------------------------------------------------------------------------------------------------------------------------------|---------------------------------------------------------------------------|------------------------------------------------------|-----------------------------------------------------------------------------------------------------------------------------------------------------------------------------------------------------------------------------|-----------------------------------------------------------------------------------------------------------------|----------------------------------------------------------------------------------------------------------------------------------------------------------------------------------------------------------------------------------------------------------------------------------------------------------------------|-----------------------------------|------------------------------------------------------------------------------------------------|
|                            | who were prescribed for the first time and at least once a DPP-4 inhibitors, a sulphonylurea, or a glitazone, alone or in combination with metformin | therapeutic chemical classes A10BH/A10BD07/A10BD08                        |                                                      | hospitalization for cardiovascular causes, previous glucose lowering medications use) were identified by ICM-9 and ATC classes                                                                                              | heart failure (hospital discharge ICD-9 code 428) during the 12 months before the index date were excluded      | medications, the presence of previous hospitalizations, the Charlson index level grouped into three categories previous oral glucose-lowering medications, the presence of a co-treatment with metformin, and adherence level categorized on the basis of the medication possession ratio                            | of heart failure (ICD-9 code 428) | outcome and exposure variable data in the database                                             |
| Fu (2015) <sup>14</sup>    | NR                                                                                                                                                   | Statement not explicit; likely from the data of pharmacy claims           | Drawn from the same population as the exposed cohort | NR                                                                                                                                                                                                                          | Statement not explicit; analyses were stratified by presence of baseline cardiovascular disease                 | Propensity score was used to identify control, and the covariates included demographics, general clinical characteristics, and hospitalization for heart failure risk factors from the 1-year baseline; cox models were built to estimate the adjusted hazard ratio stratified by presence of cardiovascular disease | NR                                | Authors did not mention the completeness of outcome and exposure variable data in the database |
| Seong (2015) <sup>13</sup> | Diabetic patients were identified by ICD-10 codes (E11-14)                                                                                           | Statement not explicit; likely from the drug prescription in the database | Drawn from the same population as the exposed cohort | Confounding variables including age at index date, gender, duration of diabetes, presence of comorbidities, and use of the medications specified were ascertained by the ICD-10 codes and drug prescription in the database | Yes, patients with a history of cardiovascular disease within the 2.5 years prior to cohort entry were excluded | Propensity score was used to balance confounders (gender, age, duration of diabetes, microvascular complications and other comorbidities in previous year, Charlson score, etc.); weighted cox model based on propensity score values was used to estimate the hazard ratio                                          | ICD-10 code (I50)                 | Authors did not mention the completeness of outcome and exposure variable data in the database |
| Suh (2015) <sup>14</sup>   | Statement not explicit; likely from identifying patients who received a                                                                              | Statement not explicit; likely from the drug prescription in the          | Drawn from the same population as the exposed cohort | NR                                                                                                                                                                                                                          | Yes, all hospitalizations for heart failure that occurred before                                                | Cox regression model was used to control for age and sex                                                                                                                                                                                                                                                             | ICD-10 code (I50)                 | Authors did not mention the completeness of outcome and                                        |

|                             | prescription of pioglitazone, sitagliptin, or vildagliptin                                                                                                                   | database                                                            |                                                      |                                                                                                                                                                                                                                                  | medication was initiated were excluded                                                                                                              |                                                                                                                                                                                                                                                                              |                                                                                                                                                              | exposure variable data in the database                                                         |
|-----------------------------|------------------------------------------------------------------------------------------------------------------------------------------------------------------------------|---------------------------------------------------------------------|------------------------------------------------------|--------------------------------------------------------------------------------------------------------------------------------------------------------------------------------------------------------------------------------------------------|-----------------------------------------------------------------------------------------------------------------------------------------------------|------------------------------------------------------------------------------------------------------------------------------------------------------------------------------------------------------------------------------------------------------------------------------|--------------------------------------------------------------------------------------------------------------------------------------------------------------|------------------------------------------------------------------------------------------------|
| Velez (2015) <sup>115</sup> | Diabetic patients were identified by having a primary diagnosis of diabetes mellitus using the electronic data                                                               | Statement not explicit; likely from the data of prescription claims | Drawn from the same population as the exposed cohort | NR                                                                                                                                                                                                                                               | Yes, patients with an earlier diagnosis of heart failure during the study duration were excluded                                                    | Multivariable cox proportional hazards regression was used to adjusted for propensity score, number of antidiabetic drugs, duration of diabetes, baseline beta-blocker use, and angiotensin converting enzyme inhibitor/angiotensin receptor blocker use                     | Hospital admission for heart failure was the first inpatient admission with a primary discharge diagnosis of heart failure during the period of observation. | Authors did not mention the completeness of outcome and exposure variable data in the database |
| Wang (2014) <sup>15</sup>   | Diabetic patients were identified by the presence of $\geq 2$ medical claims containing International Classification of Diseases, Ninth Revision codes for diabetes mellitus | Statement not explicit; likely from the data of pharmacy claims     | Drawn from the same population as the exposed cohort | Comorbidities as hypoglycemia and heart failure was ascertained by the ICD-9 codes in the first 3 positions of the hospital discharge diagnoses, and other comorbidities were confirmed by ICD-9 codes or procedure claims before the index date | Statement not explicit; the rates of patients with heart failure at baseline in sitagliptin and control group were similar (7.1% vs. 6.6%, p=0.218) | Propensity-score matching approach was used to identify control, and the covariates included age, gender, duration of diabetes, antidiabetic drugs used, comorbidities and outpatient visit; cox proportional hazard models were built to estimate the adjusted hazard ratio | ICD-9 codes in the first position of the hospital discharge diagnoses                                                                                        | Authors did not mention the completeness of outcome and exposure variable data in the database |

DPP-4=Dipeptidyl peptidase-4; ICD-9-CM=International Classification of Diseases, Ninth Revision, Clinical Modification; ICD-10=International Classification of Diseases 10th revision; NR=not reported; ATC=Anatomical Therapeutic Chemical.
