# Supplementary material for: Dipeptidyl peptidase-4 inhibitors and risk of heart failure in type 2 diabetes: systematic review and meta-analysis of randomised and observational studies
Source: PubMed Central journal article supplement — BMJ. 2016 Feb 17;352:i610. doi: 10.1136/bmj.i610 (PMC4772781; doi:10.1136/bmj.i610), 2016-02-17
Supplement: lili029738.ww5_default.pdf [file lili029738.ww5_default.pdf]

## Appendix 5 Risk of bias of included case-control studies

| Author (year)                                                 | Ascertainment of type 2 diabetes                                                                          | Is case definition adequate                                                                                                       | Selection of controls                                                                                                                                                                                                                             | Definition of controls                                                                       | Ascertainment of exposure to incretin agents                    | Ascertainment of other confounding variables                                             | Same method of ascertainment for exposure to DPP-4 inhibitors agents                           | Comparability of study controls for important factors                                                                                                                                                                                                                                                                                                                 | Completeness of data within database                             |
|---------------------------------------------------------------|-----------------------------------------------------------------------------------------------------------|-----------------------------------------------------------------------------------------------------------------------------------|---------------------------------------------------------------------------------------------------------------------------------------------------------------------------------------------------------------------------------------------------|----------------------------------------------------------------------------------------------|-----------------------------------------------------------------|------------------------------------------------------------------------------------------|------------------------------------------------------------------------------------------------|-----------------------------------------------------------------------------------------------------------------------------------------------------------------------------------------------------------------------------------------------------------------------------------------------------------------------------------------------------------------------|------------------------------------------------------------------|
| <b>Studies reporting heart failure</b>                        |                                                                                                           |                                                                                                                                   |                                                                                                                                                                                                                                                   |                                                                                              |                                                                 |                                                                                          |                                                                                                |                                                                                                                                                                                                                                                                                                                                                                       |                                                                  |
| Eurich (2014) <sup>112</sup>                                  | Diabetes subjects identified by ICD-9 CM codes                                                            | Yes, cases were patients who developed incident heart failure within 30 days of admission to hospital for acute coronary syndrome | Cases were matched (using risk set sampling) by age and sex with up to 10 controls with no heart failure prior to the index date for their given case                                                                                             | Patients with no heart failure                                                               | Statement not explicit; likely from the data of pharmacy claims | NR                                                                                       | Yes, both cases and controls who had been prescribed incretins identified with claims database | Conditional logistic regression was used to control for demographics, clinical and laboratory data, pharmacy claims, health care utilization and propensity scores (conditional probability of being treated with metformin or sulfonylurea or insulin or sitagliptin).                                                                                               | Authors did not mention the completeness of data in the database |
| <b>Studies reporting hospital admission for heart failure</b> |                                                                                                           |                                                                                                                                   |                                                                                                                                                                                                                                                   |                                                                                              |                                                                 |                                                                                          |                                                                                                |                                                                                                                                                                                                                                                                                                                                                                       |                                                                  |
| Weir (2014) <sup>16</sup>                                     | Statement not explicit; likely from identifying the clinical diagnoses according to the ICD-9-CM codes    | Yes, cases were patients with the outcome of hospitalization for heart failure                                                    | Up to 10 controls were selected by matching on age (quartiles) and sex with no hospital admission, and all controls were alive on the same index date for their given case using conventional risk set sampling (i.e., incident density sampling) | Patients with no hospital admission                                                          | Statement not explicit; likely from the data of pharmacy claims | NR                                                                                       | Statement not explicit; likely from the data of pharmacy claims                                | Conditional logistic regression was used to control for demographics (age, sex, and socioeconomic status), most recent clinical laboratory data (HbA1c; low- and high-density lipoprotein cholesterol; triglycerides; estimated glomerular filtration rate; albuminuria; and hemoglobin concentrations), history of cardiovascular disease, and prescription drug use | Authors did not mention the completeness of data in the database |
| Yu (2015) <sup>17</sup>                                       | Statement not explicit; likely from identifying patients newly treated with noninsulin antidiabetic drugs | Yes, case subjects were defined by hospitalization for congestive heart failure                                                   | Up to 20 control subjects per case were randomly selected using risk set sampling, matched on duration                                                                                                                                            | Statement not explicit; likely patients with no hospitalization for congestive heart failure | Statement not explicit; likely from the medical records         | Statement not explicit; confounding variables were likely ascertained by identifying the | Statement not explicit; likely from the medical records                                        | In addition to conditioning on the matching variables (i.e., duration of follow-up, age, duration of treated diabetes, and calendar year of cohort entry) , conditional logistic                                                                                                                                                                                      | Completeness of data in the database not mentioned, however, the |

---

(metformin, sulfonylureas, thiazolidinediones,  $\alpha$ -glucosidase inhibitors, guar gum, meglitinides, and incretin-based drugs)

of follow up, age, duration of treated diabetes, and calendar year of study cohort entry

medical records

regression was used to control for sex, BMI, excessive alcohol use, smoking status, HbA1c level, comorbidities such as neuropathy, renal disease, retinopathy, atrial fibrillation, cancer, chronic obstructive pulmonary disease, coronary artery disease, dyslipidemia, hypertension, previous myocardial infarction, peripheral arteriopathy, previous coronary revascularization, peripheral vascular disease, and previous stroke, all measured at any time prior to cohort entry

database has been shown to be valid and of high quality

---

ICD-9-CM= International Classification of Diseases, Ninth Revision, Clinical Modification; NR= not reported.
